# Supplementary material
Source: PubMed Central journal article supplement (PMC9794388)
Supplement: mmc1.pdf [file mmc1.pdf]

*400 °C, 0.94 emissivity, sensing size : 120 mm dia.*

# BLACK BODY

**Model : BB-400**

**ISO-9001, CE, IEC1010**

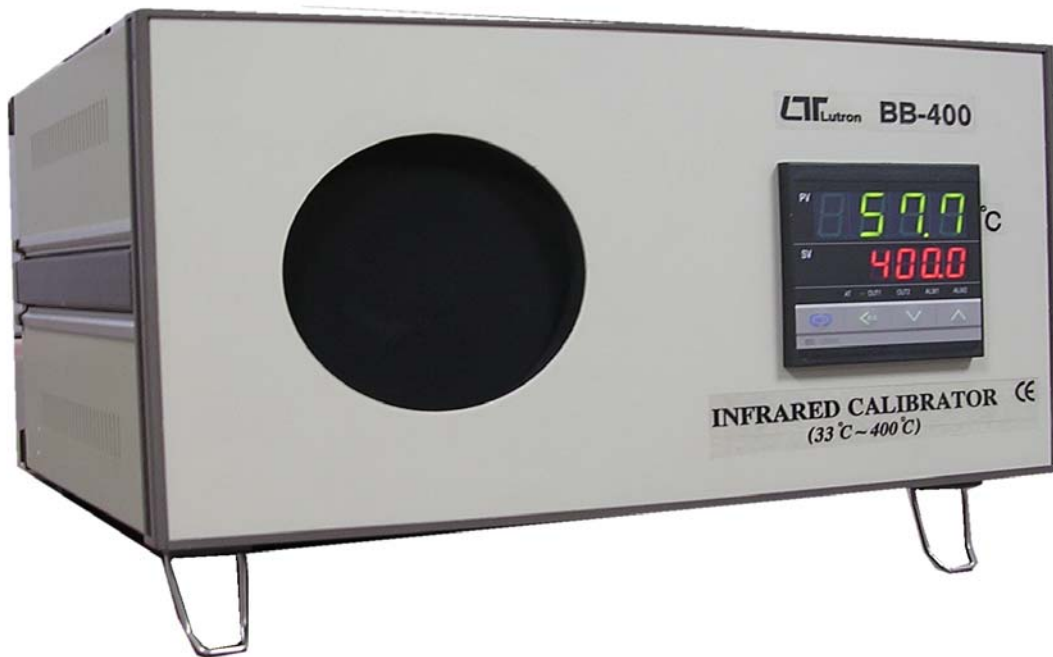

## FEATURES

- \* Black body, calibrator for the infrared thermometer.
- \* Temp. setting range : 33 °C to 400 °C.
- \* Temp. setting resolution : 0.1 °C.
- \* Accuracy :  $\pm ( 1\% + 1 \text{ } ^\circ\text{C} )$ .
- \* Emissivity : 0.94.
- \* Sensing size : round, 120 mm dia.
- \* Power supply : 110 ACV or 220 ACV.
- \* Weight : approx. 12 Kg .
- \* Dimension ( HWD ) : 190 x 400 x 335 mm.

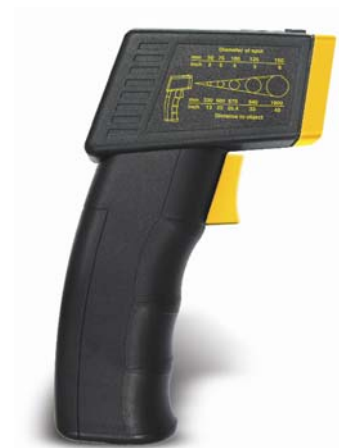

Precision calibrator for IR Thermometer

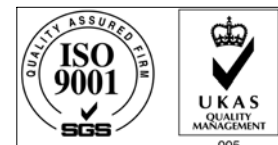

**Lutron**

**LUTRON ELECTRONIC**

***The Art of Measurement***

# BLACK BODY

Model : BB-400

## FEATURES

|                                                                                                                                |
|--------------------------------------------------------------------------------------------------------------------------------|
| * The infrared calibrator (BB-400) is the professional black body that designed for calibrating your IR thermometer precisely. |
| * 120 mm ( 4.72 " ) diameter, large black body target that can provide IR positive Temp. sources.                              |
| * A high-emissivity coating is baked on the target to assure calibration accurately.                                           |
| * 0.94 emissivity value.                                                                                                       |
| * Wide measure range : 33 °C to 400 °C .                                                                                       |

## APPLICATIONS

|                                                                                                                                        |
|----------------------------------------------------------------------------------------------------------------------------------------|
| This infrared calibrator ( black body ) is specially developed to calibrate the IR THERMOMETER to meet laboratory or factory standard. |
|----------------------------------------------------------------------------------------------------------------------------------------|

## SPECIFICATIONS

|                               |                                                                                                                                                                                           |
|-------------------------------|-------------------------------------------------------------------------------------------------------------------------------------------------------------------------------------------|
| Display                       | LED type.                                                                                                                                                                                 |
| Temperature Range             | 33 to 400 °C . 92 to 752 °F.                                                                                                                                                              |
| Accuracy                      | ± 1 °C : 33 to 100 °C .                                                                                                                                                                   |
|                               | ± 2 °C : 101 to 250 °C .                                                                                                                                                                  |
|                               | ± 3 °C : 251 to 400 °C .                                                                                                                                                                  |
|                               | ± 2 °F : 92 to 212 °F.                                                                                                                                                                    |
|                               | ± 4 °F : 213 to 482 °F.                                                                                                                                                                   |
|                               | ± 6 °F : 483 to 752 °F.                                                                                                                                                                   |
| Resolution                    | 0.1 degree.                                                                                                                                                                               |
| Heating time<br>( stability ) | 33 to 100 °C : Approx. 10 minutes.<br>33 to 250 °C : Approx. 25 minutes.<br>33 to 400 °C : Approx. 55 minutes.                                                                            |
| Target Emissivity             | 0.94.                                                                                                                                                                                     |
| Black body<br>Dimension       | 120 mm (4.72") diameter.<br>* <i>Target area ( Black body surface )</i> .                                                                                                                 |
| Power Supply                  | AC 220 V± 10 V, 50/60 Hz.                                                                                                                                                                 |
| Power Current                 | Approx. 4.3 Amp.                                                                                                                                                                          |
| Operating duty<br>Cycle       | * For prolonged life and safe operation, if the operating Temp. is over 300 °C , then the working time should less 2 hours.<br>* Always allow one hour cooling off period between cycles. |
| Dimension                     | 400 x 330 x 190 mm. (15.75 x 13.0 x 7.5 inch).                                                                                                                                            |
| Weight                        | 12.45 kg / 27 lb.                                                                                                                                                                         |
| Accessories                   | Power cable..... 1 PC<br>Main instruction manual..... 1 PC<br>Controller instruction manual..... 1 PC                                                                                     |
